# Supplementary material for: Docetaxel-conjugated bile acid-derived nanomicelles can inhibit tumour progression with reduced toxicity
Source: Royal Society of Chemistry journal article supplement (doi:10.1039/d4na00715h), 2025-01-01
Supplement: d4na00715h1.pdf [file d4na00715h1.pdf]

## Supporting Information

### Docetaxel-conjugated Bile Acid-derived Nanomicelles can Inhibit Tumour Progression with Reduced Toxicity

Devashish Mehta,<sup>1,a</sup> Chhavi Dua,<sup>2,a</sup> Ruchira Chakraborti,<sup>2,a</sup> Poonam Yadav,<sup>2</sup> Ujjaini Dasgupta,<sup>1</sup> Avinash Bajaj<sup>2,\*</sup>

1. Amity Institute of Biotechnology, Amity University Haryana, Panchgaon, Manesar, Gurgaon-122413, Haryana, India.

2. Laboratory of Nanotechnology and Chemical Biology, Regional Centre for Biotechnology, NCR Biotech Science Cluster, 3<sup>rd</sup> Milestone, Faridabad-Gurgaon Expressway, Faridabad-121001, Haryana, India.

a: authors contributed equally.

#### Corresponding authors:

\*Avinash Bajaj, Email: [bajaj@rcb.res.in](mailto:bajaj@rcb.res.in)

# <sup>1</sup>H NMR

LCA-PA-AcCl

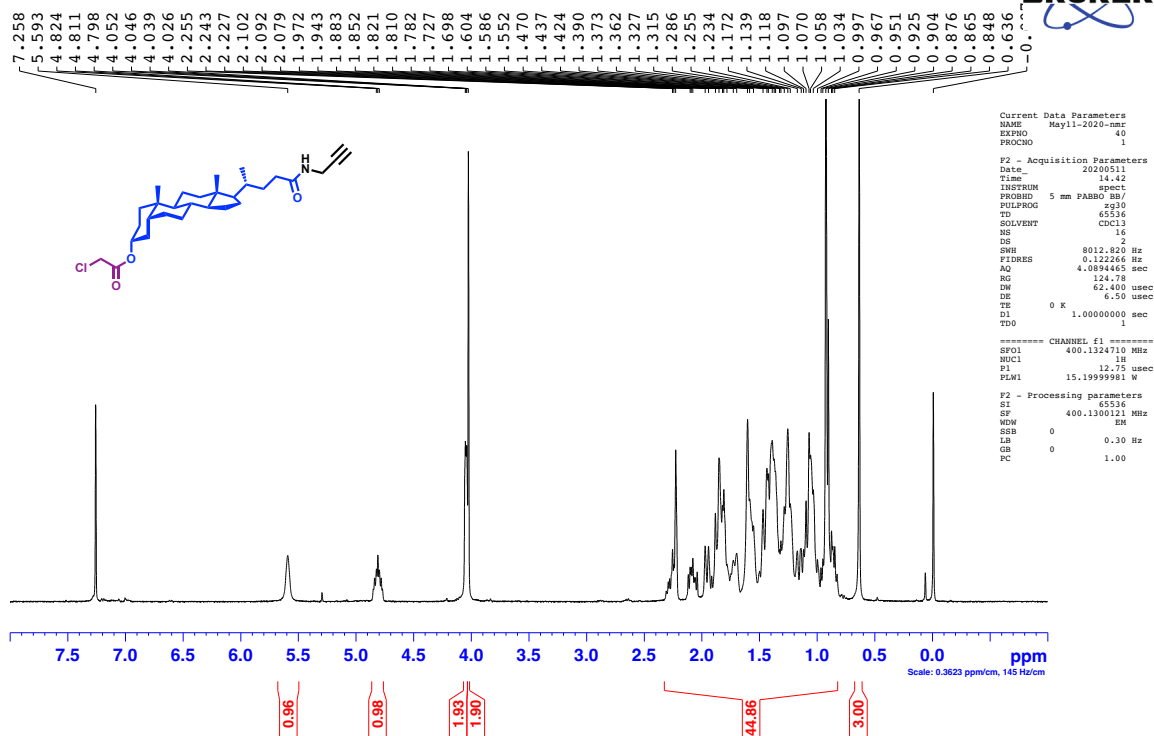

# HRMS

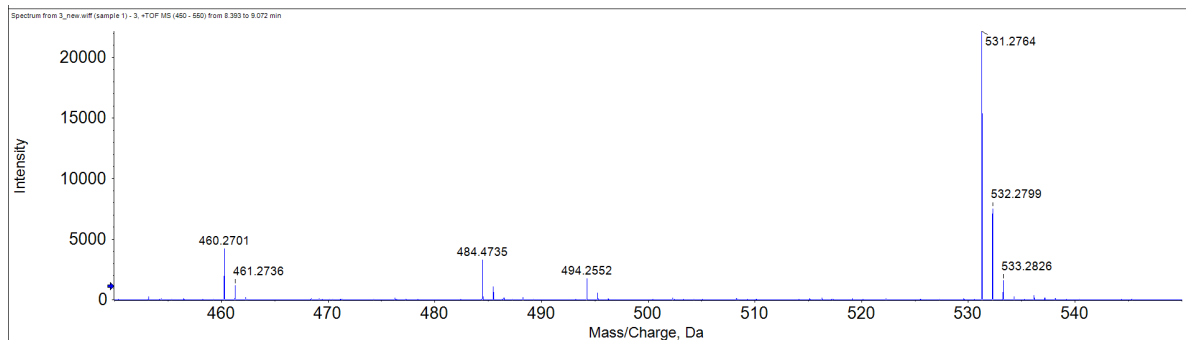

Figure S1. <sup>1</sup>H NMR and HRMS of Compound 7.

# <sup>1</sup>H NMR

LCA-DTX-ACCL

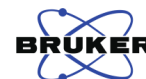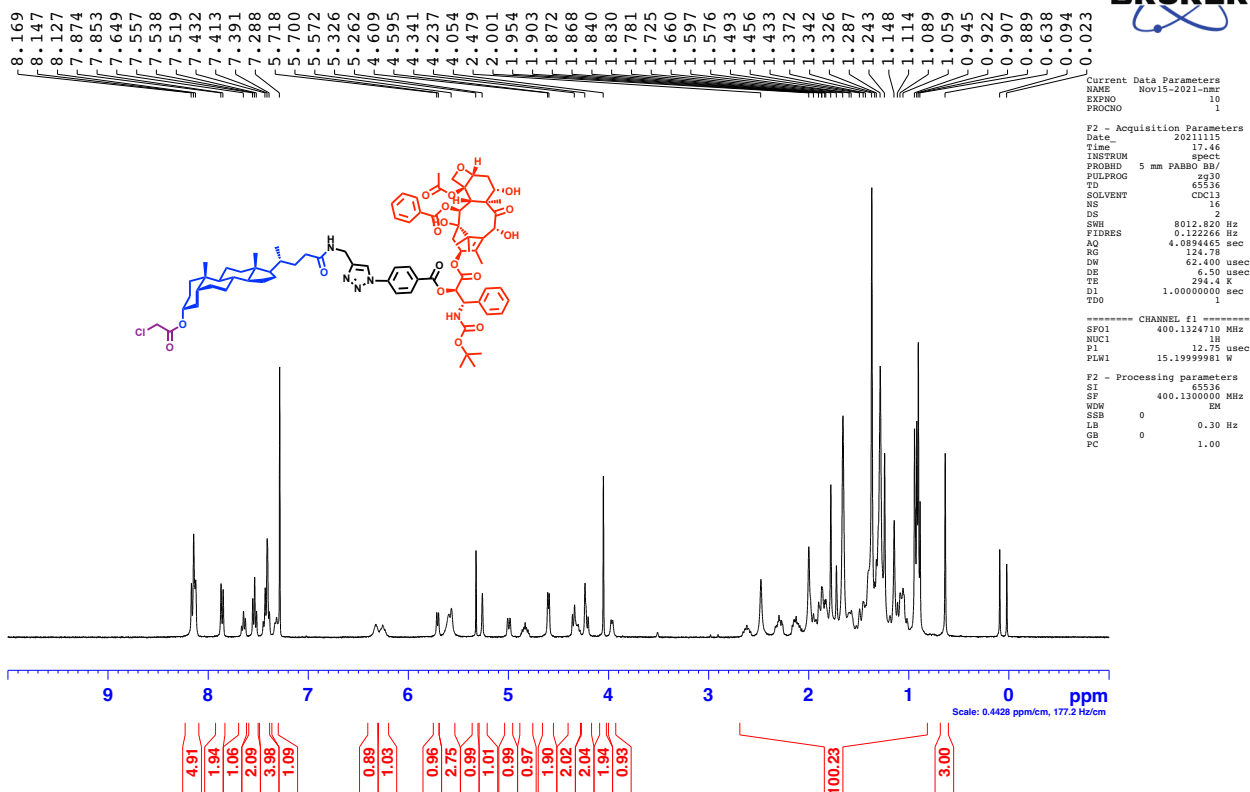

# HRMS

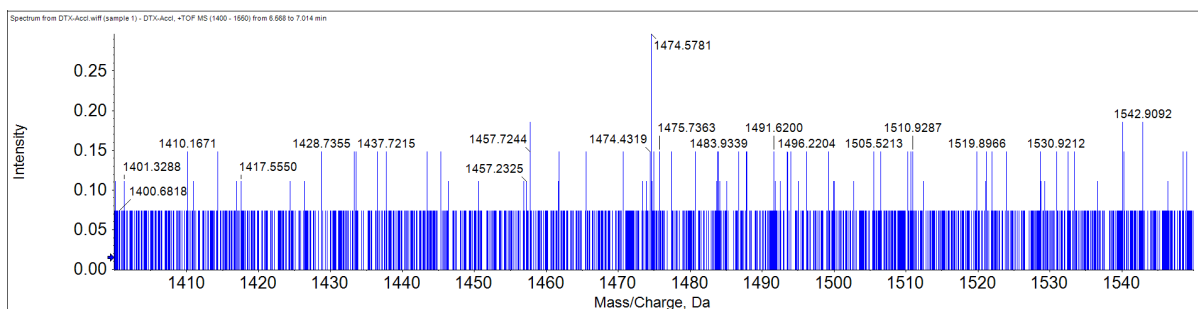

Figure S2. <sup>1</sup>H NMR and HRMS of Compound 8.

# <sup>1</sup>H NMR

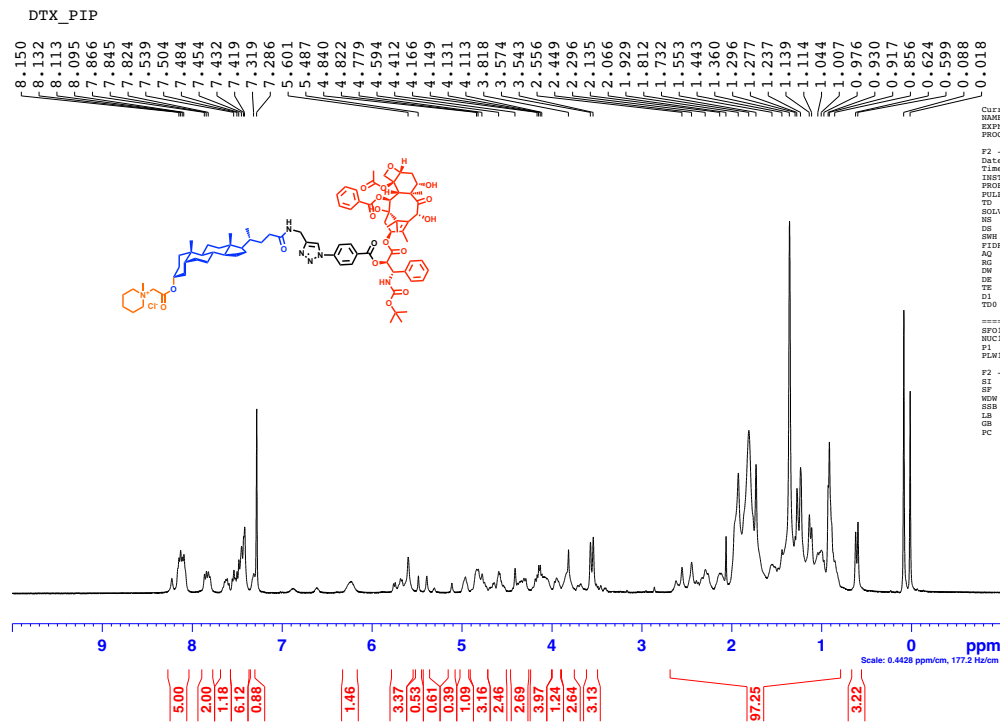

# HRMS

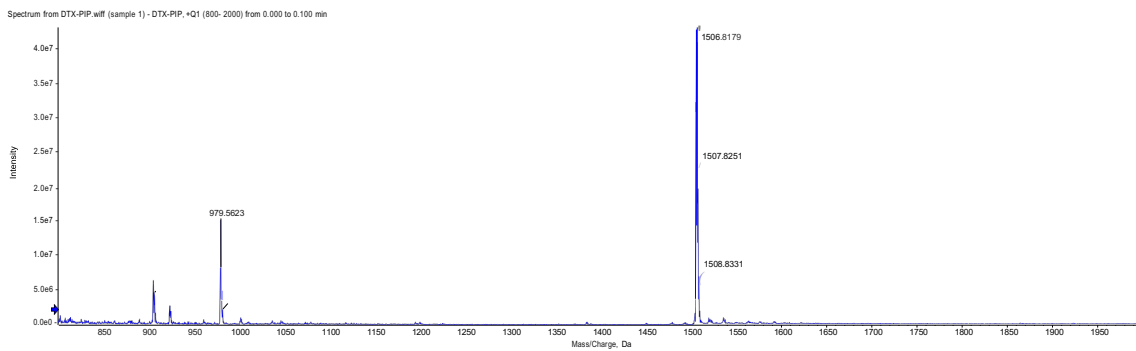

# HPLC

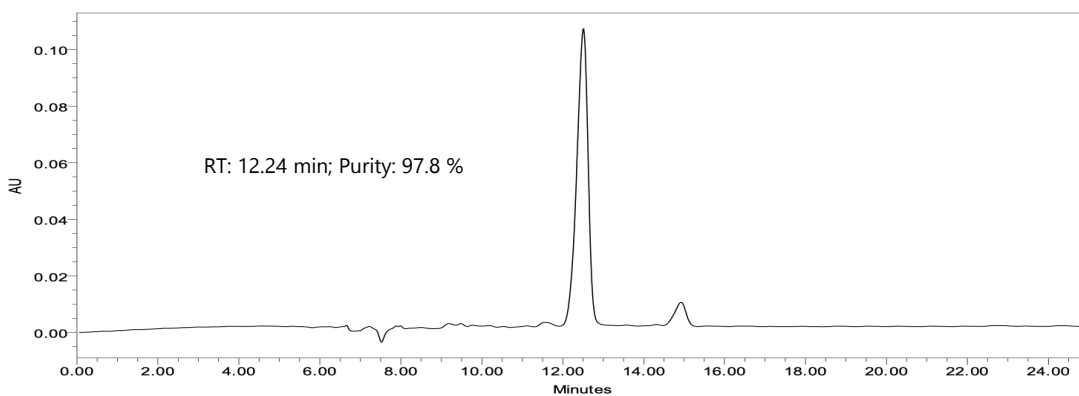

Figure S3. <sup>1</sup>H NMR, HRMS and HPLC of compound 1.

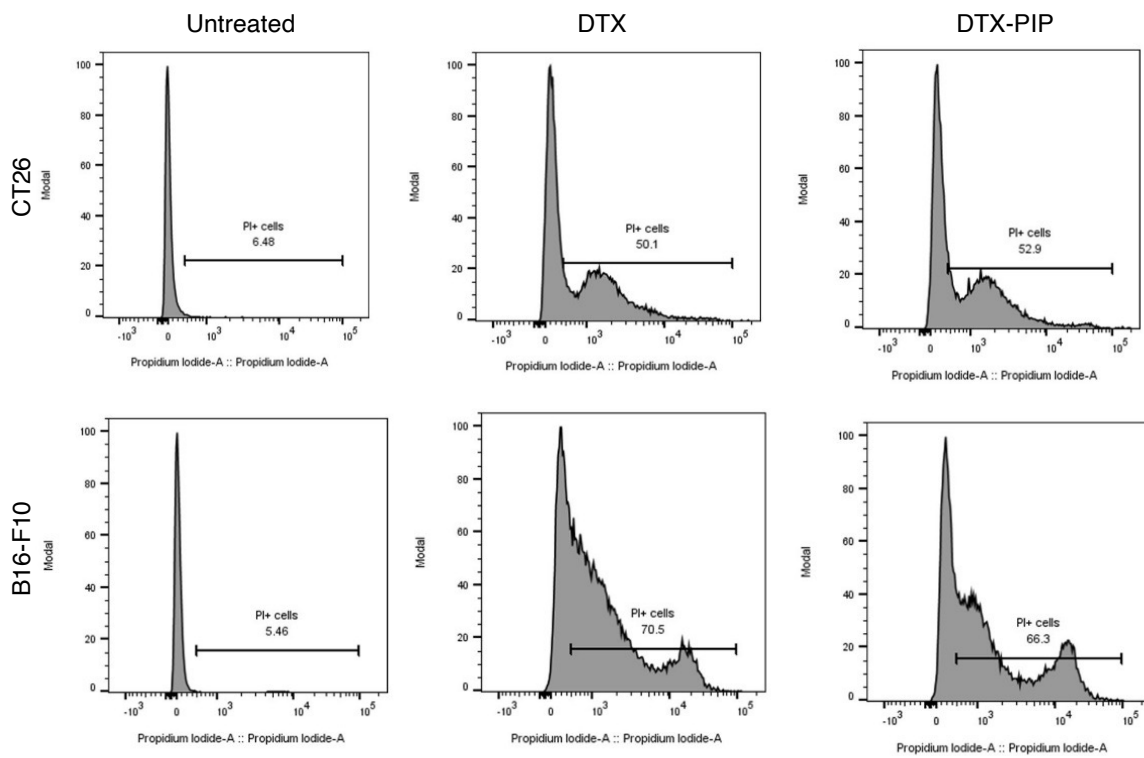

Figure S4. Histograms showing the percentage of PI-positive cells across various groups.

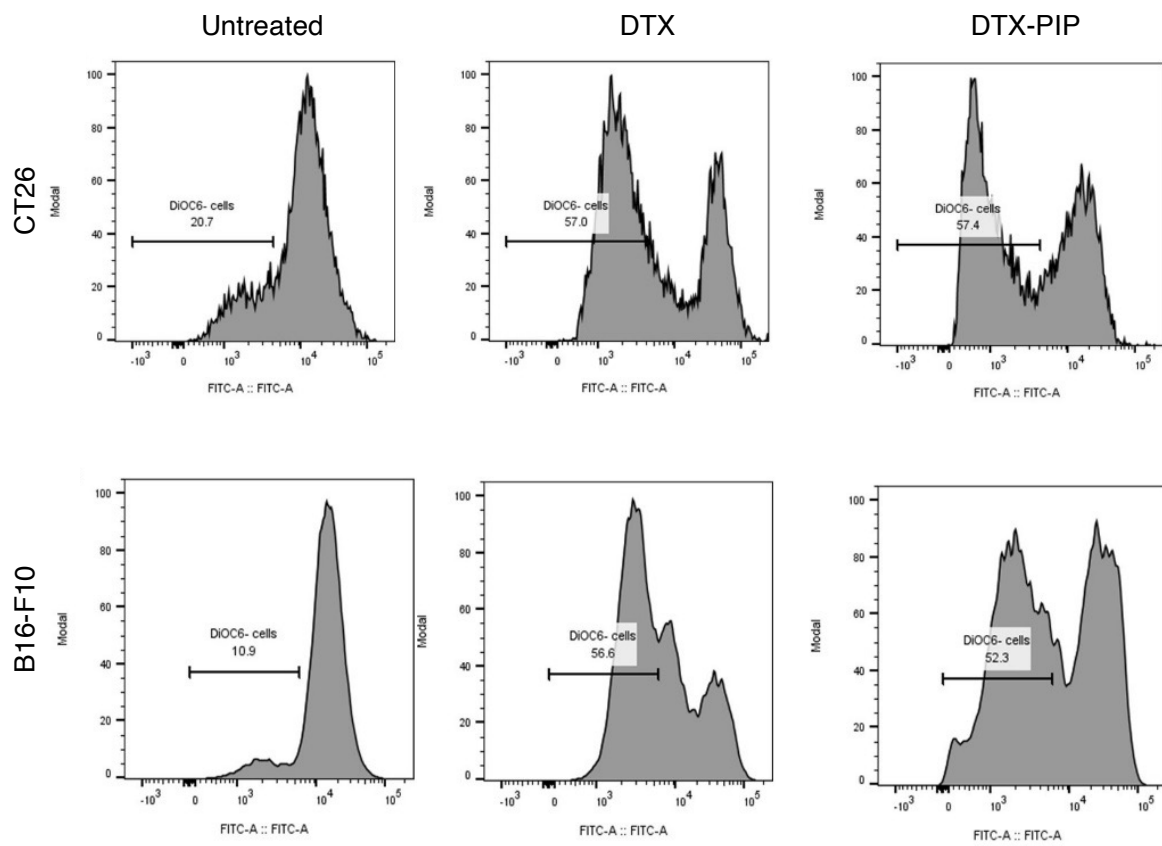

Figure S5. Histograms depicting the percentage of DiOC<sub>6</sub> negative cells in different groups.

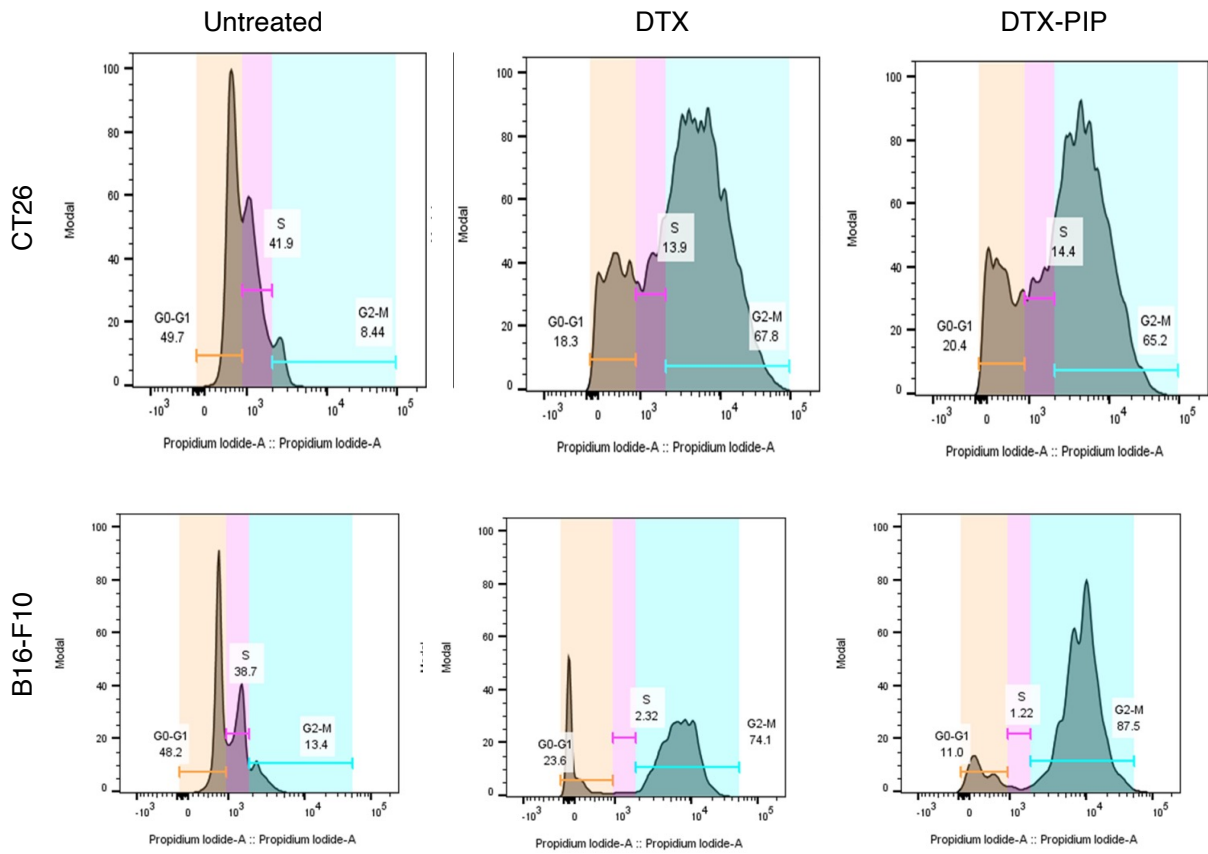

**Figure S6.** Cell cycle distribution of CT26 and B16-F10 cells in untreated and different treatment groups.
